# Supplementary material for: Ni foam-supported Zn–Co–Ni ternary oxide nanosheet arrays derived from an MOF precursor with enhanced performances for supercapcitors and Ni–Zn batteries
Source: Royal Society of Chemistry journal article supplement (doi:10.1039/d2nj05544a), 2023-01-01
Supplement: d2nj05544a1.pdf [file d2nj05544a1.pdf]

## Supporting Information

### Ni foam-supported Zn-Co-Ni ternary oxide nanosheet arrays derived from MOF precursor with enhanced performances for supercapacitor and Ni-Zn battery

Yang Liu,<sup>a,b</sup> Minglun Wei,<sup>b</sup> Caijiang Jiang,<sup>b</sup> Ruyu Cui,<sup>b</sup> Junjie Liu,<sup>b</sup> Xinrong Chang,<sup>b</sup>

Bowen Ren,<sup>b</sup> Jingchao Zhang,<sup>b</sup> Liangliang Huang,<sup>\*a</sup> Daojun Zhang<sup>\*b</sup>

<sup>a</sup> School of Petrochemical Engineering, Liaoning Petrochemical University, Fushun 113001, Liaoning, P. R. China.

<sup>b</sup> College of Chemistry and Chemical Engineering, Anyang Normal University, Anyang 455000, Henan, P. R. China.

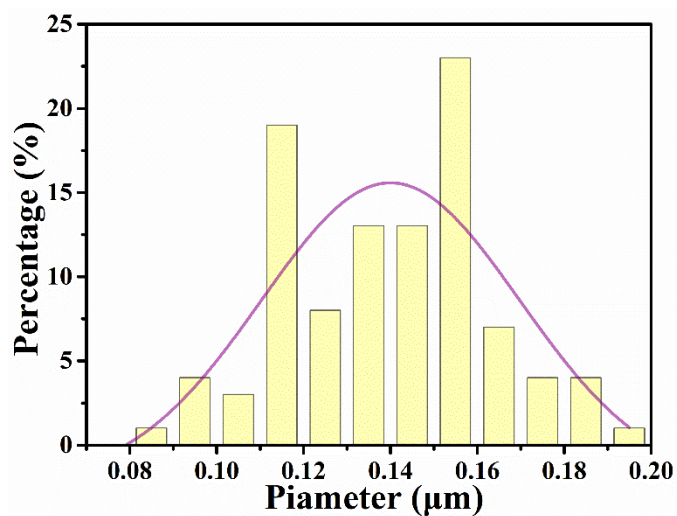

Fig. S1. Particle size distribution of the ZnCoNi-MOF precursor.

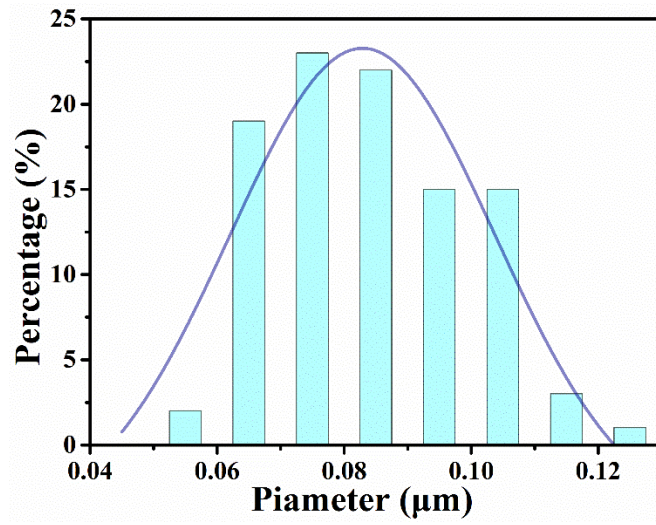

Fig. S2. The thickness distribution of the ZnCo<sub>2</sub>O<sub>4</sub>-NiO nanosheets.

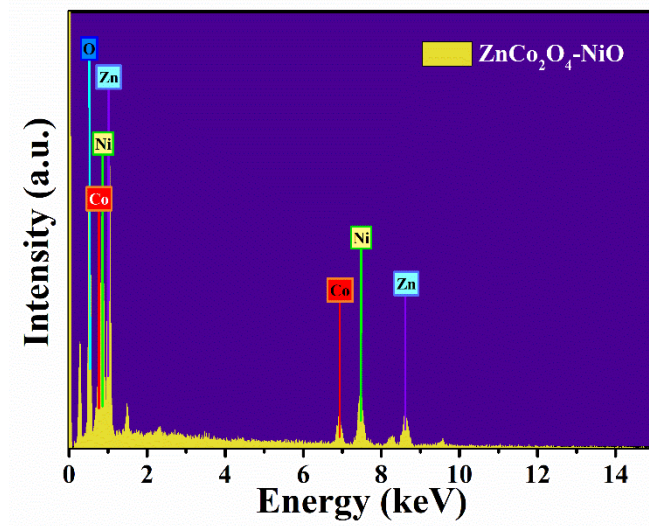

Fig. S3. Energy spectrum of ZnCo<sub>2</sub>O<sub>4</sub>-NiO sample.

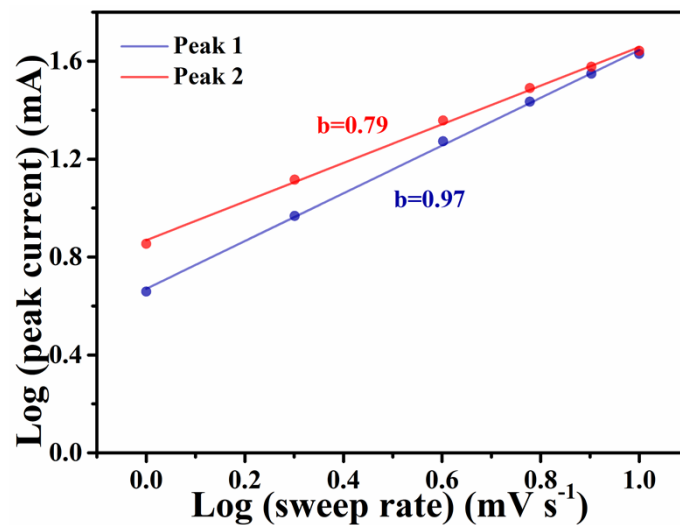

Fig. S4. The fitted  $b$  value corresponding to the redox peaks of  $\text{ZnCo}_2\text{O}_4\text{-NiO}$  electrode in three electrode system.

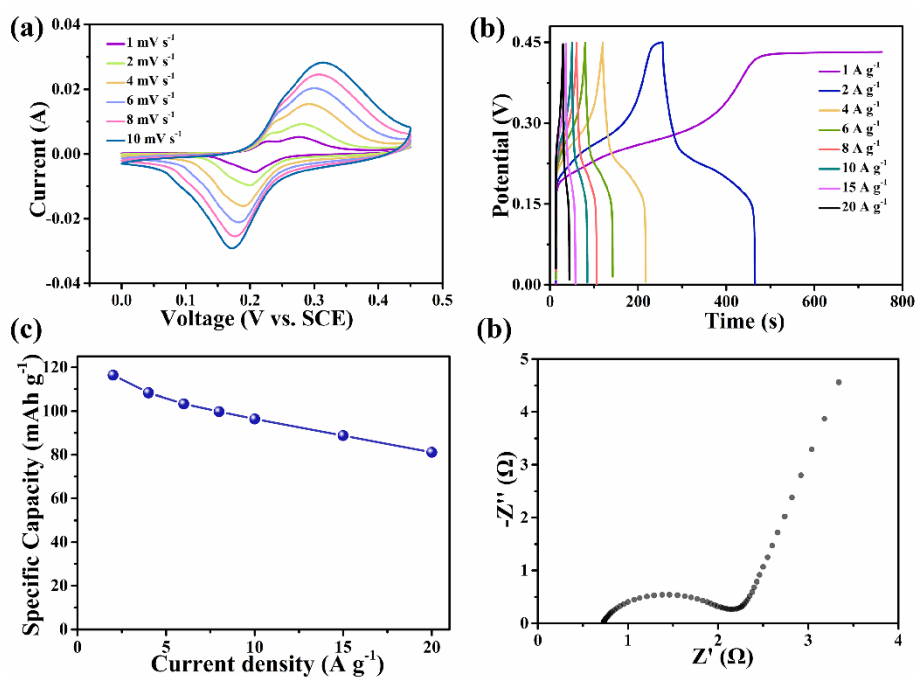

Fig. S5. (a) CV curves, (b) GCD curves, (c) specific capacity at different current density, and (d) EIS plot of  $\text{ZnCoNi-MOF}$  precursor electrode in three electrode system.

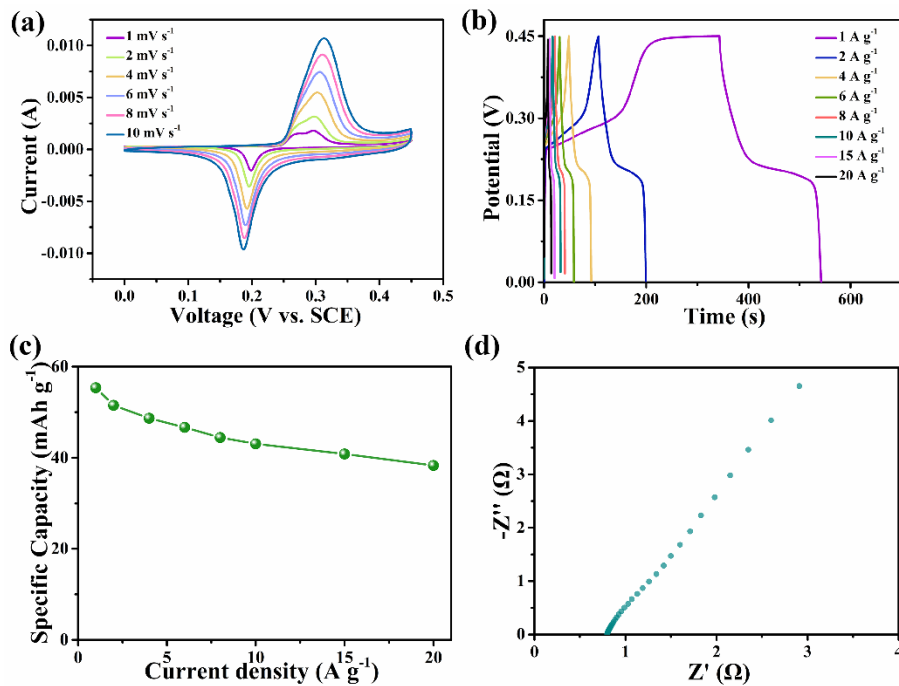

Fig. S6. The electrochemical performance of the ZnNi-oxide/NF electrode, (a) CV curves, (b) GCD curves, (c) specific capacity at different current density, and (d) EIS plot.

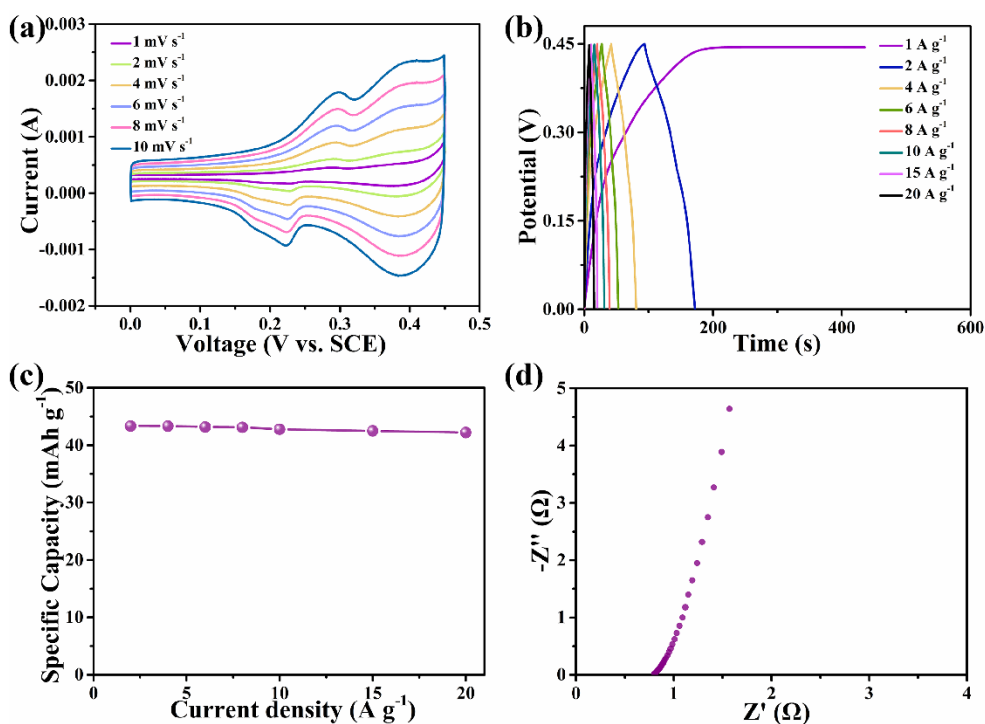

Fig. S7. The electrochemical performance of the ZnCo-oxide/NF electrode, (a) CV curves, (b) GCD curves, (c) specific capacity at different current density, and (d) EIS plot.

Table S1. EDS analysis of the elemental composition of ZnCo<sub>2</sub>O<sub>4</sub>-NiO samples.

| Sample                                | Ni (at%) | Co (at%) | Zn (at%) | O (at%) |
|---------------------------------------|----------|----------|----------|---------|
| ZnCo <sub>2</sub> O <sub>4</sub> -NiO | 30.77    | 7.27     | 13.68    | 48.28   |

Table S2. Comparison of specific capacity as supercapacitor for the as-synthesized electrodes.

| Current densities | ZnCo <sub>2</sub> O <sub>4</sub> -NiO<br>(mA h g <sup>-1</sup> ) | ZnCoNi-MOF<br>(mA h g <sup>-1</sup> ) | ZnNi-oxide/NF<br>(mA h g <sup>-1</sup> ) | ZnCo-oxide/NF<br>(mA h g <sup>-1</sup> ) |
|-------------------|------------------------------------------------------------------|---------------------------------------|------------------------------------------|------------------------------------------|
| 1 A               | 196.67                                                           | —                                     | 55.36                                    | —                                        |
| 2 A               | 189.44                                                           | 116.39                                | 51.50                                    | 43.35                                    |
| 4 A               | 182.89                                                           | 108.33                                | 48.67                                    | 43.33                                    |
| 6 A               | 178.00                                                           | 103.33                                | 46.67                                    | 43.17                                    |
| 8 A               | 173.78                                                           | 99.78                                 | 44.44                                    | 43.11                                    |
| 10 A              | 168.89                                                           | 96.39                                 | 43.06                                    | 42.78                                    |
| 15A               | 157.08                                                           | 88.75                                 | 40.83                                    | 42.50                                    |
| 20 A              | 147.78                                                           | 81.11                                 | 38.33                                    | 42.22                                    |

Table S3. Resistance comparison of different samples.

|          | ZnCo <sub>2</sub> O <sub>4</sub> -NiO/NF<br>(Ω) | ZnCoNi-MOF/NF<br>(Ω) | ZnNi-oxide/NF<br>(Ω) | ZnCo-oxide/NF<br>(Ω) |
|----------|-------------------------------------------------|----------------------|----------------------|----------------------|
| $R_s$    | 0.61                                            | 0.72                 | 0.76                 | 0.79                 |
| $R_{ct}$ | 0.17                                            | 1.23                 | 16.60                | 0.47                 |

Table S4. Comparison of the performances with various rechargeable aqueous Zn-based batteries.

| Battery materials                                        | Energy density<br>(Wh/kg) | Power density<br>(W/kg) | Ref              |
|----------------------------------------------------------|---------------------------|-------------------------|------------------|
| ZnO/Co <sub>3</sub> O <sub>4</sub> //Zn                  | 36.6                      | 356                     | 47               |
| Co <sub>3</sub> O <sub>4</sub> //Zn                      | 241                       | 1506                    | 49               |
| MoZ-12//Zn                                               | 65                        | 650                     | 53               |
| PbO <sub>2</sub> //Zn                                    | 252.39                    | 570.53                  | 54               |
| Ni <sub>2</sub> Zn-MgCo <sub>2</sub> O <sub>4</sub> //Zn | 120.4                     | 312                     | 55               |
| CuV <sub>2</sub> O <sub>6</sub> //Zn                     | 317                       | 210                     | 56               |
| A-Co(OH) <sub>2</sub> @NiCo-LDH//Zn                      | 489.6                     | 380                     | 57               |
| ZnNiP-0.5//RGO                                           | 67.4                      | 825                     | 58               |
| <b>ZnCo<sub>2</sub>O<sub>4</sub>-NiO//Zn</b>             | <b>322.47</b>             | <b>1682.14</b>          | <b>This work</b> |
